# Supplementary material for: A thienyl peripherally substituted rubrene analogue with constant emissions and good film forming ability
Source: Royal Society of Chemistry journal article supplement (doi:10.1039/c4tc01356e), 2014-01-01

## Thienyl peripherally substituted rubrene analogue with constant emissions and good film forming ability

Xiaotao Zhang, Yonggang Zhen\*, Xiaolong Fu, Jie Liu, Xiuqiang Lu, Ping He, Huanli Dong, Hantang Zhang, Guangyao Zhao, Lang Jiang and Wenping Hu\*

*Beijing National Laboratory for Molecular Sciences, Key Laboratory of Organic Solids, Institute of Chemistry, Chinese Academy of Sciences, Beijing 100190, China.*

\*Correspondence: [zhenyg@iccas.ac.cn](mailto:zhenyg@iccas.ac.cn); [huwp@iccas.ac.cn](mailto:huwp@iccas.ac.cn)

### Table of contents

|                                                                                  |              |
|----------------------------------------------------------------------------------|--------------|
| <b>Experimental Section.</b>                                                     | <b>S2-S3</b> |
| <b>Fig. S1</b> TGA curves of compound <b>4</b> and rubrene                       | <b>S4</b>    |
| <b>Fig. S2</b> DFT calculation of rubrene, compound <b>4</b> and <b>4'</b>       | <b>S5</b>    |
| <b>Fig. S3</b> The dependence of the PL intensity on the composition of hexane   | <b>S6</b>    |
| <b>Fig. S4</b> The dependence of the PL intensity on the composition of methanol | <b>S6</b>    |
| <b>Fig. S5</b> <sup>1</sup> H NMR and <sup>13</sup> C NMR of compound <b>3</b>   | <b>S7</b>    |
| <b>Fig. S6</b> <sup>1</sup> H NMR and <sup>13</sup> C NMR of compound <b>4</b>   | <b>S8</b>    |

## Experimental Section

### *Materials and Instrumentations*

All chemicals were purchased from Alfa Aesar and used without further purification. Water was purified by using a Millipore filtration system.  $^1\text{H}$  NMR and  $^{13}\text{C}$  NMR spectra were recorded on BrukerAvance 400 MHz spectrometer or BrukerAvance 300 MHz spectrometer. High resolution mass spectra (HRMS) were determined on Fourier Transform Ion Cyclotron Resonance Mass Spectrometer (APEX IV). Absorption spectra were recorded on a JASCO V-570 UV/Vis spectrophotometer. Steady-state fluorescence spectra were recorded on Hitachi (F-4500) spectrophotometers at 25 °C. All photographs were taken with a Canon digital camera. Density functional theory (DFT) calculations were performed at the B3LYP/6-31G\* level of theory by using the Gaussian 09 program package.

### *Synthesis of Compound 3 and Compound 4*

**Compound 3:** n-BuLi (1.6 M in THF, 10.4 mL, 1.1 equiv.) was added to a solution of 2-ethynylthiophene (15 mmol, 1.0 equiv.) in dry THF at -78 °C under the atmosphere of argon. After the resulting solution was stirred for 40 min at -78 °C, a solution of di(thiophen-2-yl)methanone (15 mmol, 1 equiv.) in dry THF was added slowly. After 15 min, the resulting solution was slowly warmed up to room temperature and stirred for another 10 h. Finally, the resulting mixture was quenched by saturated aqueous  $\text{NH}_4\text{Cl}$  (20 mL) and extracted with  $\text{CH}_2\text{Cl}_2$  (3  $\times$  30 mL). The combined organic layers were washed with brine (20 mL), dried with  $\text{MgSO}_4$ , concentrated under reduced pressure, and purified by flash column chromatography on silica gel (eluent: n-hexane: $\text{CH}_2\text{Cl}_2$  = 1:2) to give dark brown solids of the title compound (**3**). yield: 75%.  $^1\text{H}$  NMR (400 MHz,  $\text{CD}_2\text{Cl}_2$ )  $\delta$  (ppm):  $\delta$  7.35 (dd,  $J$  = 4.1, 2.3 Hz, 2H), 7.15 (d,  $J$  = 3.8 Hz, 1H), 6.99 (dd,  $J$  = 4.8, 3.0 Hz, 5H), 6.86 (d,  $J$  = 3.8 Hz, 1H), 3.41 (s, 1H).  $^{13}\text{C}$  NMR (75 MHz,  $\text{CD}_2\text{Cl}_2$ )  $\delta$  (ppm):  $\delta$  153.2, 150.6, 133.0, 126.8, 126.6, 126.3, 126.0, 122.2, 81.8, 76.7 and 76.2. HRMS calcd for  $\text{C}_{15}\text{H}_{10}\text{OS}_3^+$ , 301.9888; found: 301.9862.

**Compound 4:** Propargyl alcohol of compound **3** (3.02 g, 10 mmol, 1equiv) was dissolved in dry toluene (30 mL) with moderate heating, then the solution was cooled and stirred at 0 °C under a nitrogen atmosphere. Triethylamine ( $\text{NEt}_3$ ) (2.0 mL, 14 mmol, 1.4 equiv) and enzenesulfonyl

chloride (PhSO<sub>2</sub>Cl) (1.5 mL, 11.7 mmol, 1.17 equiv) were added dropwise to the solution successively to keep the temperature of the reaction below 10 °C. After the addition, the solution was stirred at 0 °C for 15 min, then warmed up to room temperature for 15 min and then heated to 110 °C for 24 h. Finally, the reaction was cooled, diluted with ethyl acetate (100 mL) and washed with 2.0 M HCl. The organic layers were collected, dried over MgSO<sub>4</sub>, concentrated under reduced pressure, and purified by flash column chromatography on silica gel (eluent: n-hexane) to give yellow solid of the title compound **4**. yield: 25%. <sup>1</sup>H NMR (400 MHz, CD<sub>2</sub>Cl<sub>2</sub>) δ (ppm): 7.36 (d, *J* = 5.8 Hz, 2H), 7.29 (dd, *J* = 5.2, 1.2 Hz, 2H), 7.25 (dd, *J* = 5.2, 1.2 Hz, 2H), 6.99 (d, *J* = 5.8 Hz, 2H), 6.86 (dd, *J* = 5.1, 3.5 Hz, 2H), 6.83 (dd, *J* = 5.2, 3.5 Hz, 2H), 6.80 (dd, *J* = 3.5, 1.2 Hz, 2H), 6.74 (dd, *J* = 3.5, 1.2 Hz, 2H) <sup>13</sup>C NMR (100 MHz, CD<sub>2</sub>Cl<sub>2</sub>) δ (ppm): 143.3, 142.7, 141.8, 140.5, 130.2, 129.9, 129.2, 128.7, 127.0, 126.8, 126.7, 126.1, 126.0, 125.6 and 124.2. HRMS calcd for C<sub>30</sub>H<sub>16</sub>S<sub>6</sub><sup>+</sup>, 567.9571; found: 567.9490; Elemental analysis calculated for C<sub>30</sub>H<sub>16</sub>S<sub>6</sub> (%): C, 63.40; H, 2.84. found: C, 63.38; H, 2.86.

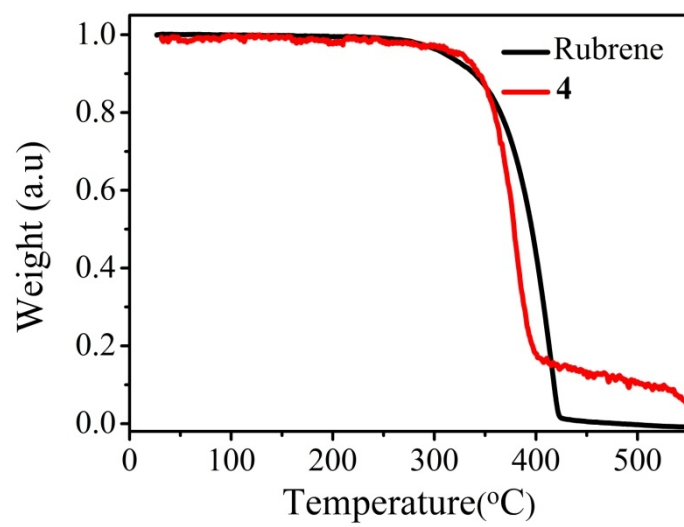

**Fig. S1.** TGA curve of compound **4** and rubrene, with a heating rate of 10 °C/min under nitrogen.

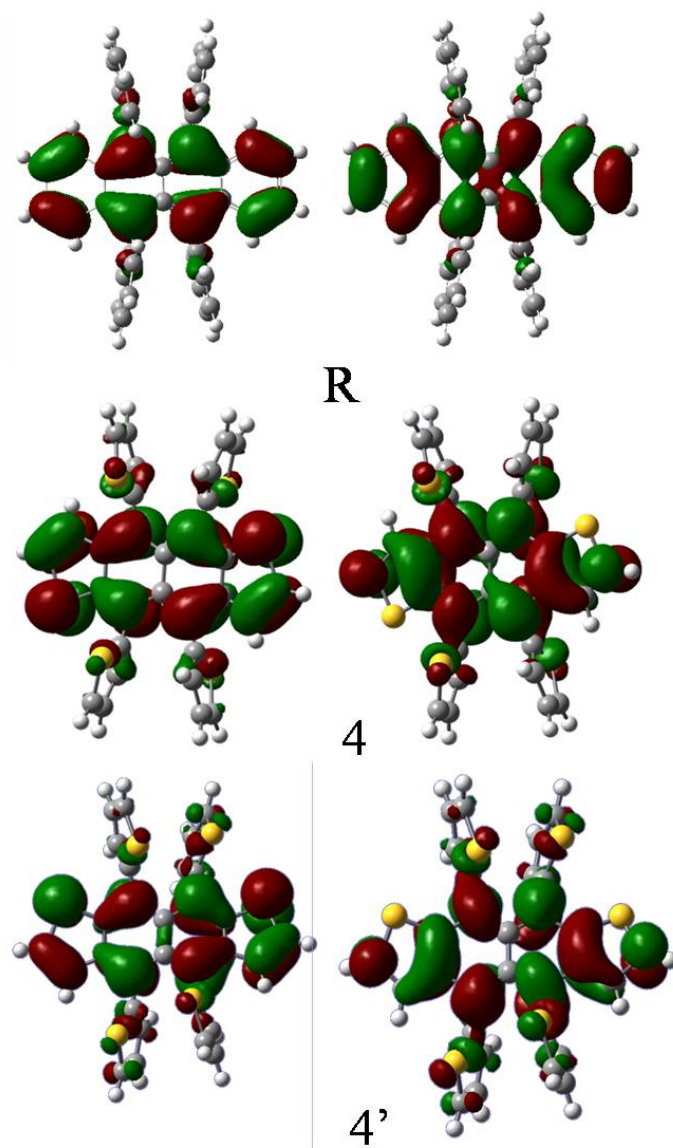

**Fig. S2.** HOMO (left) and LUMO (right) orbitals of rubrene (R), compounds 4 and isomer 4' calculated by DFT theory.

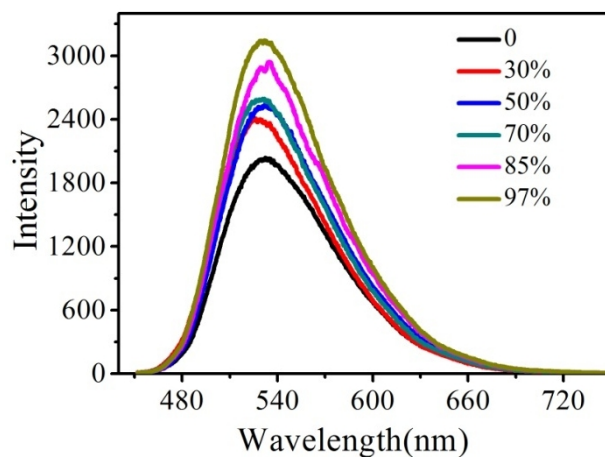

**Fig. S3.** The dependence of the PL intensity on the composition of hexane (solvent:  $\text{CH}_2\text{Cl}_2$ ). The concentration was kept at  $40 \mu\text{M}$ , excitation wavelength:  $442 \text{ nm}$ .

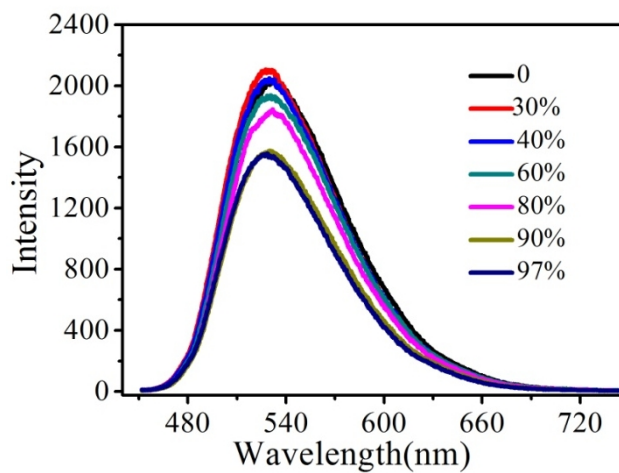

**Fig. S4.** The dependence of the PL intensity on the composition of methanol (solvent:  $\text{CH}_2\text{Cl}_2$ ). The concentration was kept at  $40 \mu\text{M}$ , excitation wavelength:  $442 \text{ nm}$ .

Fig. S5  $^1\text{H}$  NMR and  $^{13}\text{C}$  NMR of compound 3

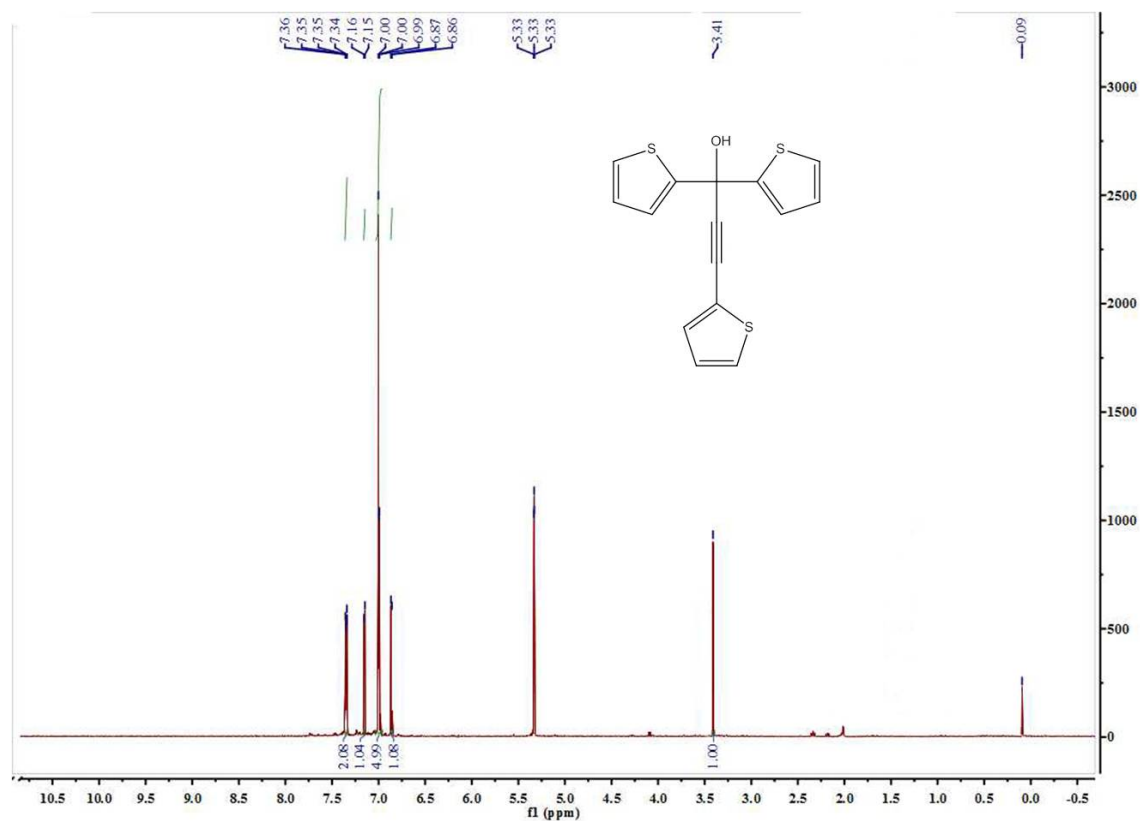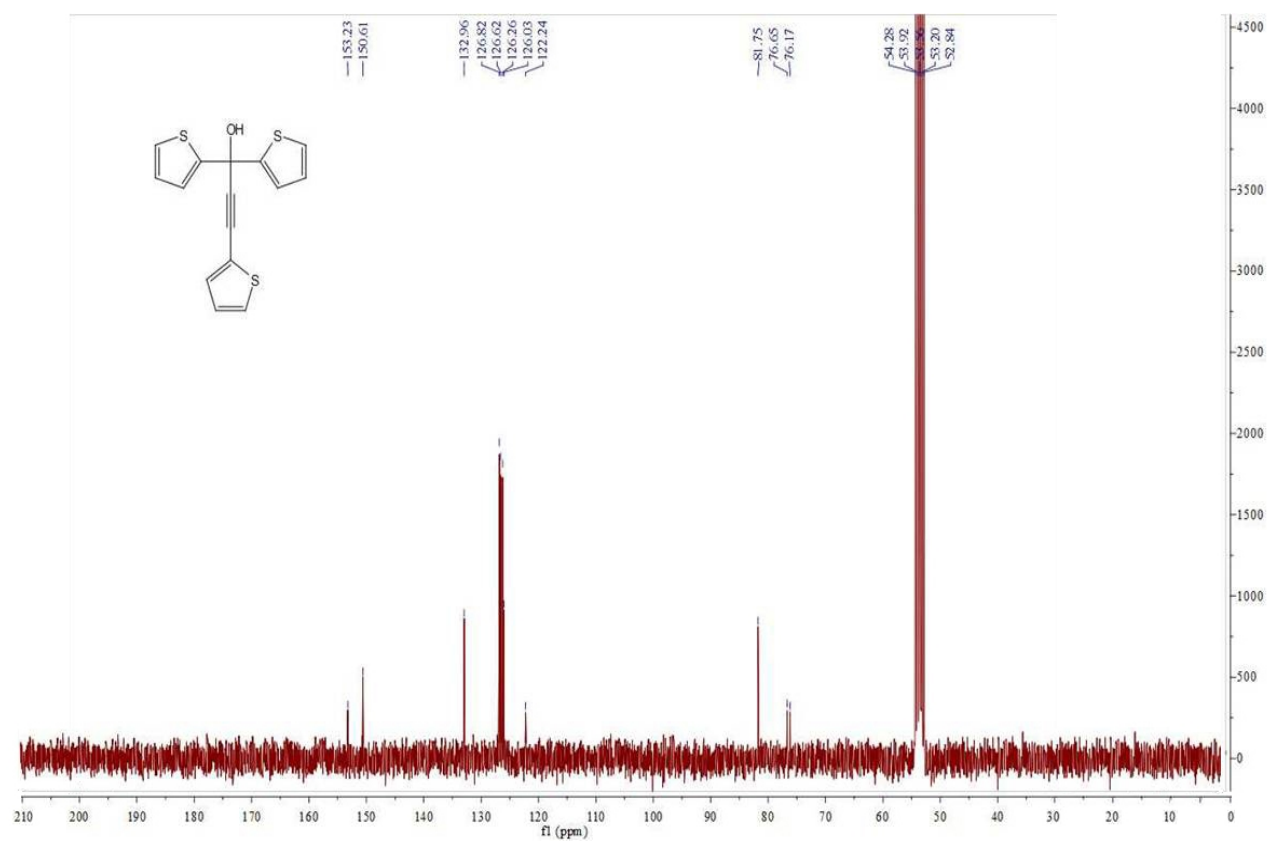

Fig. S6  $^1\text{H}$  NMR and  $^{13}\text{C}$  NMR of compound 4

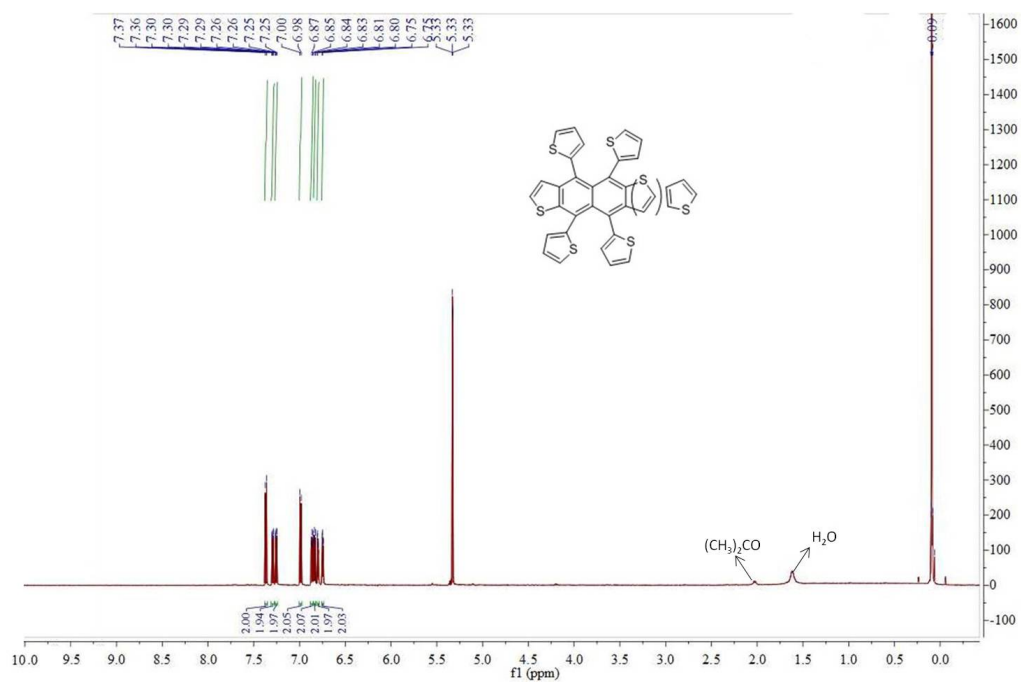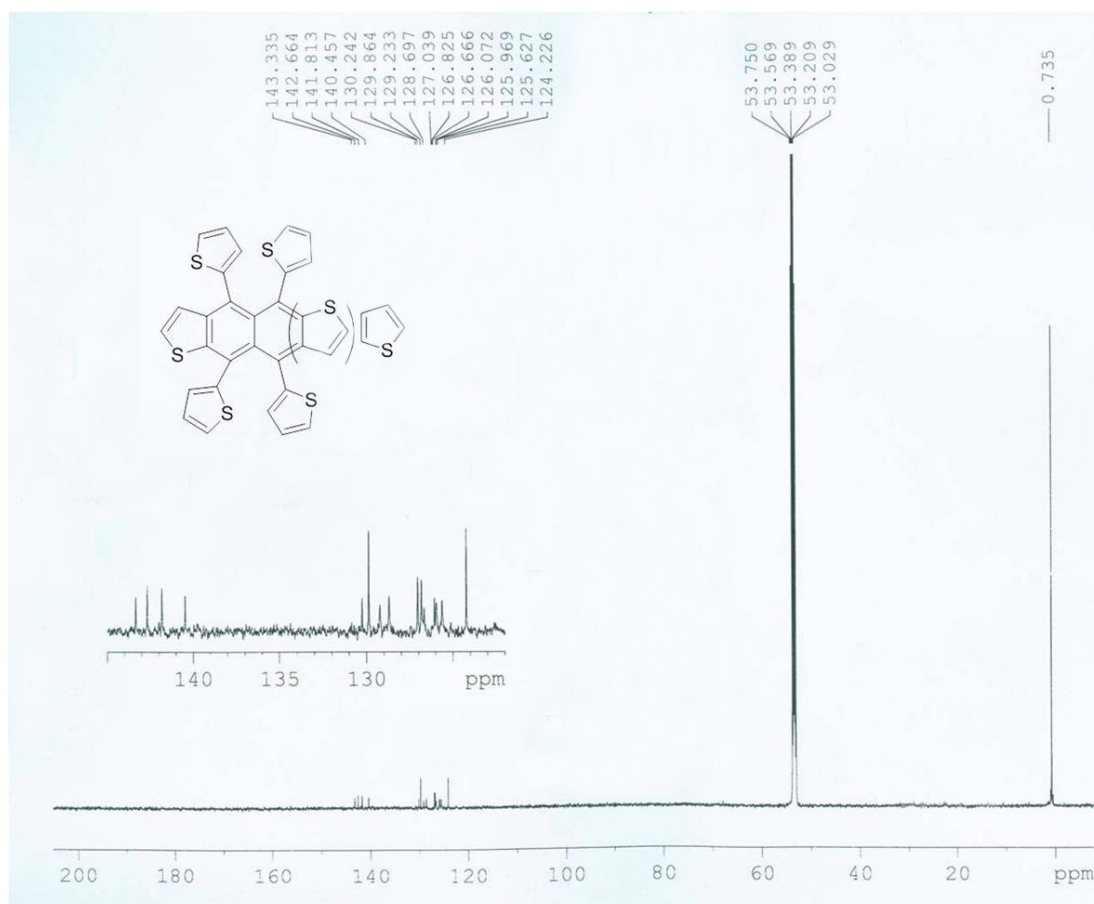

Supplement: c4tc01356e1.pdf [file c4tc01356e1.pdf]
